# Supplementary material
Source: Springer Nature journal article supplement (https://www.springermedizin.de/resource/supplementary/12872_2004_39_MOESM2_ESM.pdf/9430932)
Supplement: MOESM2 [file 9430932]

## My Chances of Stroke or Bleeding in the Next Two Years

---

### My Chances of Stroke: if I do not take Warfarin or Aspirin

We are interested in your opinion about your chances of stroke in the next two years if you **do not** take warfarin or aspirin to prevent a stroke. Please put down your best guess for these questions.

1. Do you consider yourself to be (*check ✓ one box*):

- Low risk for stroke
- Moderate risk for stroke
- High risk for stroke
- Very high risk for stroke

2. For 100 people at the same risk of stroke as you, how many do you think will suffer a stroke in the next 2 years?

\_\_\_\_ out of 100 people

### My Chances of a Major Bleed: if I do not take Warfarin or Aspirin

Now we are interested in your opinion about your chances of having a “major bleed” in the next 2 years, if you are not taking warfarin or aspirin. A “major bleed” is bleeding from the bowel, or into the head or belly. A major bleed requires hospitalization or a blood transfusion.

3. Do you consider yourself to be (*check ✓ one box*):

- Low risk for a major bleed
- Average risk for a major bleed
- High risk for a major bleed

4. For 100 people at the same risk of a major bleed as you, how many do you think will suffer a major bleed in the next 2 years?

\_\_\_\_ out of 100 people

### **My Chances of Stroke or Bleeding with Taking Warfarin:**

Now we are interested in your opinion about how warfarin will affect your chances of stroke or bleeding in the next 2 years.

5. For 100 people at the same risk of stroke as you, who take warfarin for 2 years, how many will suffer a stroke in the next 2 years?

\_\_\_\_ out of 100 people

6. For 100 people at the same risk of a major bleed as you, who take warfarin for 2 years, how many will suffer a major bleed in the next 2 years?  
A major bleed is bleeding from the bowel, or into the head or belly. A major bleed requires hospitalization or a blood transfusion.

\_\_\_\_ out of 100 people

### **My Chances of Stroke or Bleeding with Taking Aspirin:**

Now we are interested in your opinion about how aspirin will affect your chances of stroke or bleeding in the next 2 years.

7. For 100 people at the same risk of stroke as you, who take aspirin for 2 years, how many will suffer a stroke in the next 2 years?

\_\_\_\_ out of 100 people

8. For 100 people at the same risk of a major bleed as you, who take aspirin for 2 years, how many will suffer a major bleed?  
A major bleed is bleeding from the bowel, or into the head or belly. A major bleed requires hospitalization or a blood transfusion.

\_\_\_\_ out of 100 people
